# Supplementary material for: Functionalized Collagen/Poly(ethylene glycol) Diacrylate Interpenetrating Network Hydrogel Enhances Beta Pancreatic Cell Sustenance
Source: MDPI journal article supplement (doi:10.3390/gels9060496), 2023-06-19
Supplement: s1 [file s1]

# Functionalized collagen/poly(ethylene glycol) diacrylate inter-penetrating network hydrogel enhances beta-pancreatic cell sustenance

Natalia Moreno-Castellanos\*<sup>1</sup>, Elías Cuartas-Gómez<sup>2</sup>, Oscar Vargas-Ceballos<sup>3</sup>

<sup>1</sup> Centro de Cromatografía y Espectrometría de Masas, CROM-MASS, Universidad Industrial de Santander, Cra 27 calle 9, Bucaramanga 680002, Colombia

<sup>2</sup> CICTA Research Group, Department of Basic Sciences, Medicine School, Health Faculty, Universidad

Industrial de Santander, Cra 27 calle 9, Bucaramanga 680002, Colombia

<sup>3</sup> GIMAT Research group, Escuela de Ingeniería Metalúrgica y Ciencia de Materiales, Universidad Industrial de Santander, Cra 27 calle 9, Bucaramanga 680002, Colombia

\*Correspondence: [nrmorcas@uis.edu.co](mailto:nrmorcas@uis.edu.co)

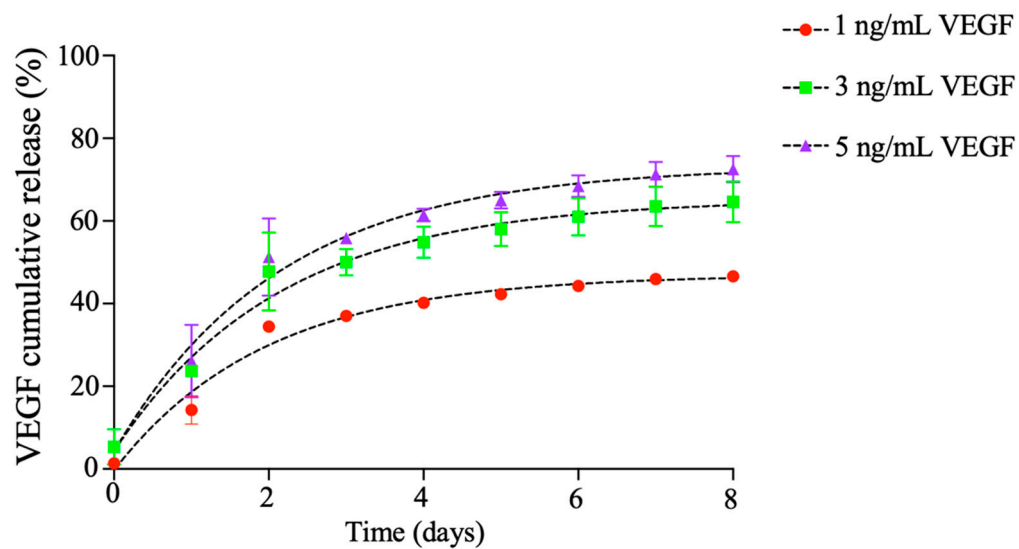

Figure S1: VEGF cumulative release profile as function of time. The *in vitro* release curve from VEGF (directly loaded) functionalized collagen/PEGDA IPN hydrogels in PBS at 37 °C expressed as a function of initial VEGF loading (n=4).
